# Supplementary figures and images for: LNCAROD enhances hepatocellular carcinoma malignancy by activating glycolysis through induction of pyruvate kinase isoform PKM2
Source: PubMed Central journal article supplement (PMC8459495; doi:10.1186/s13046-021-02090-7), 2021-09-22

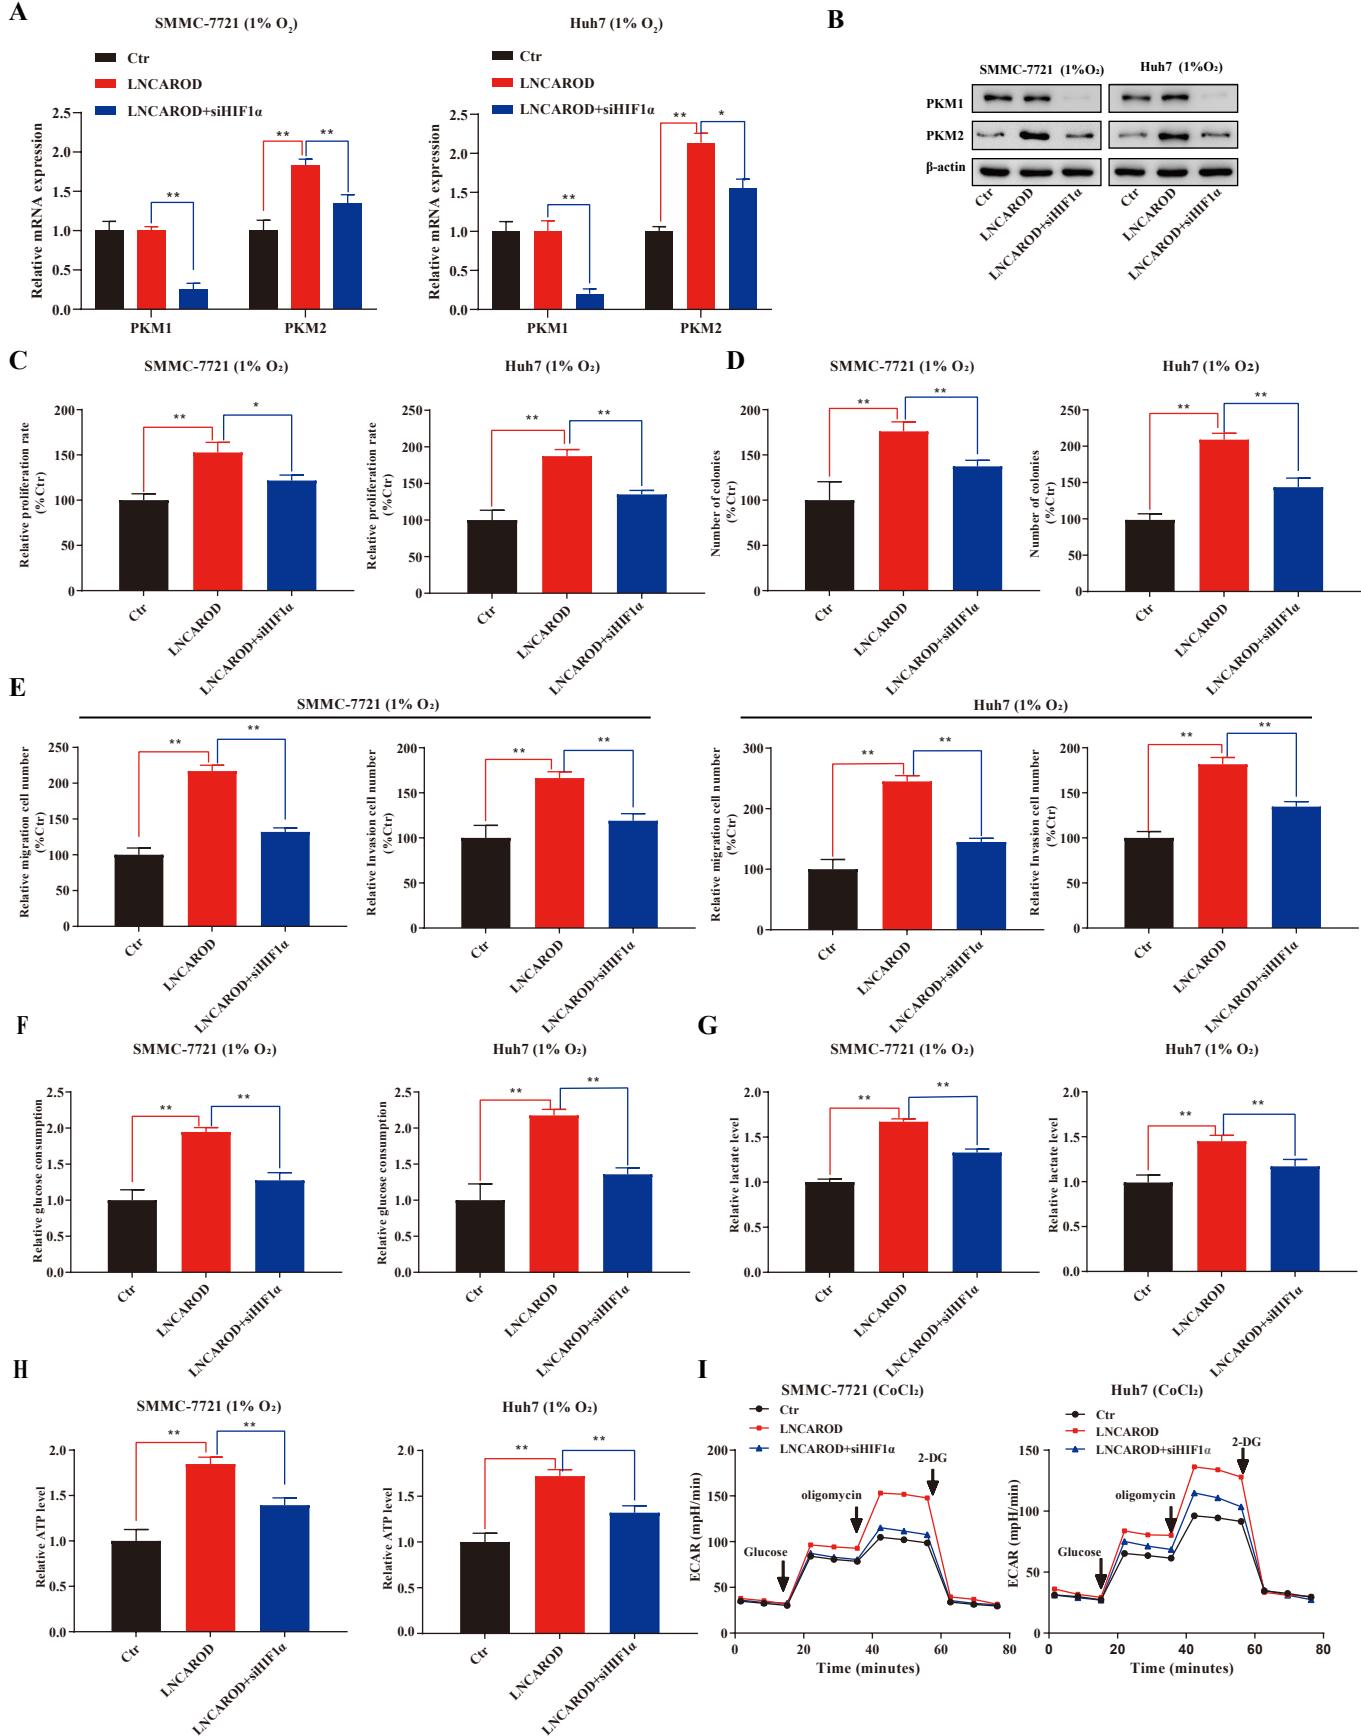

Supplement: 13046_2021_2090_MOESM10_ESM.pdf [file 13046_2021_2090_MOESM10_ESM.pdf]

**A**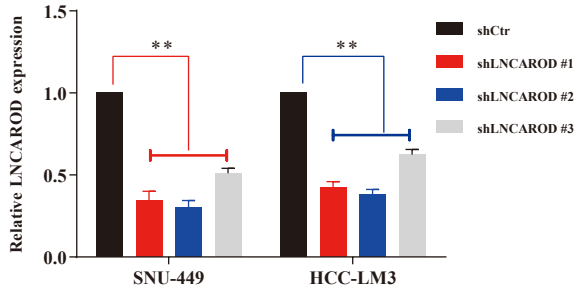**B**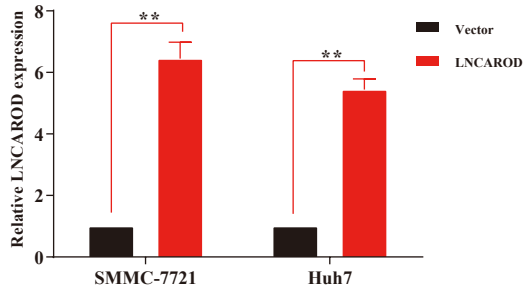

Supplement: 13046_2021_2090_MOESM1_ESM.pdf [file 13046_2021_2090_MOESM1_ESM.pdf]

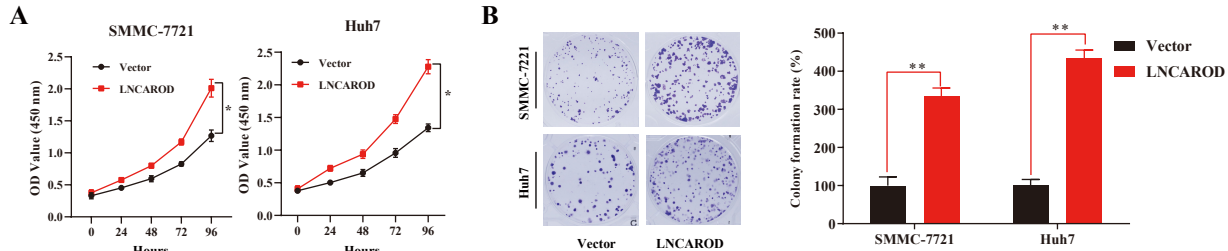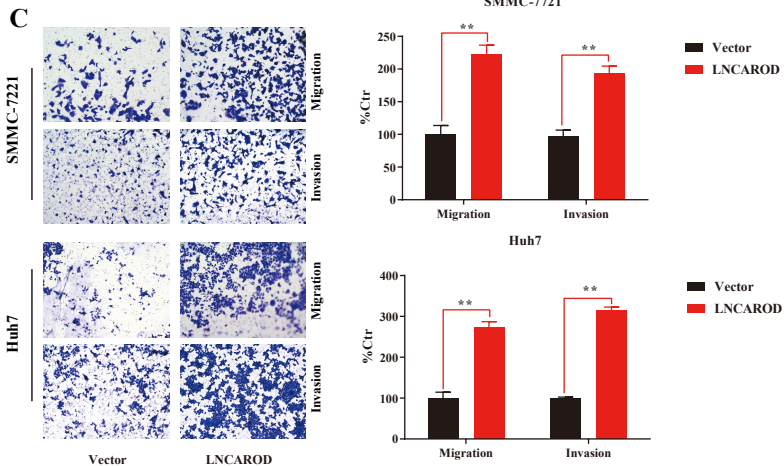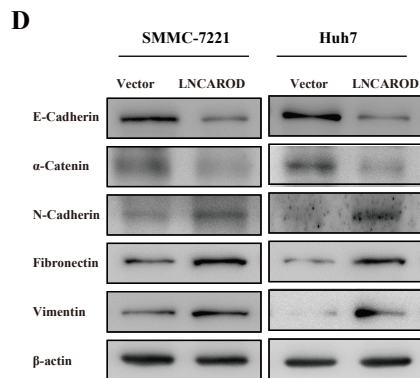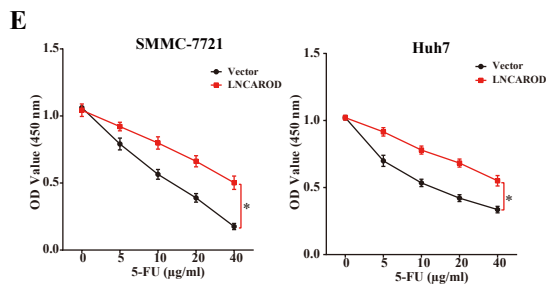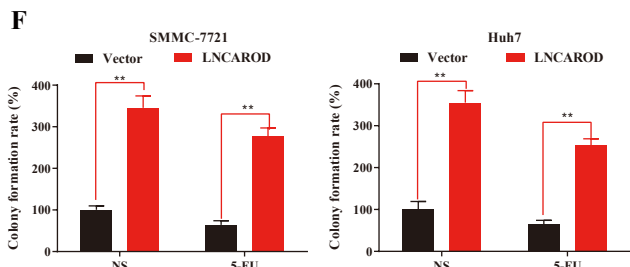

Supplement: 13046_2021_2090_MOESM2_ESM.pdf [file 13046_2021_2090_MOESM2_ESM.pdf]

## SMMC-7721

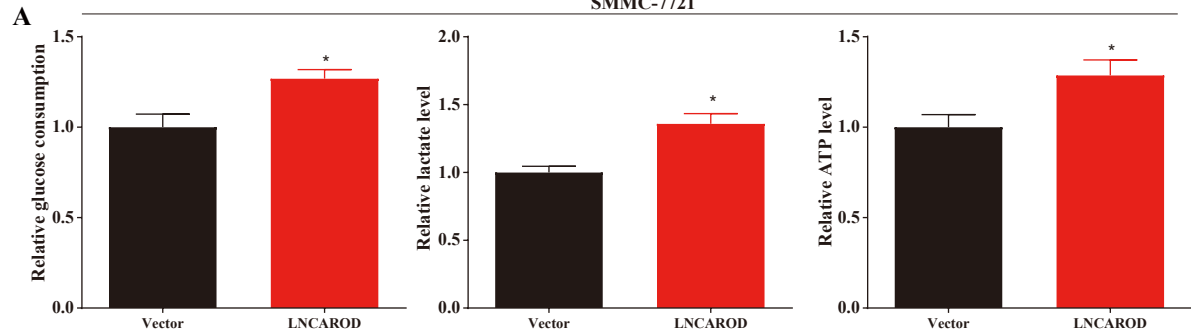

## Huh7

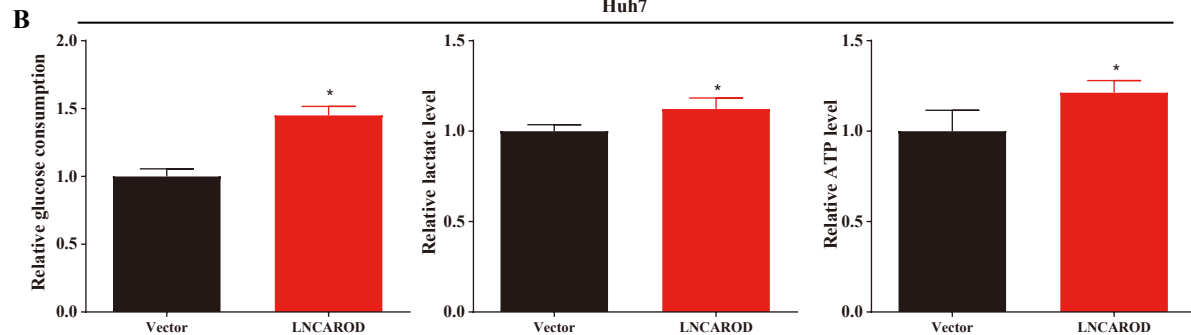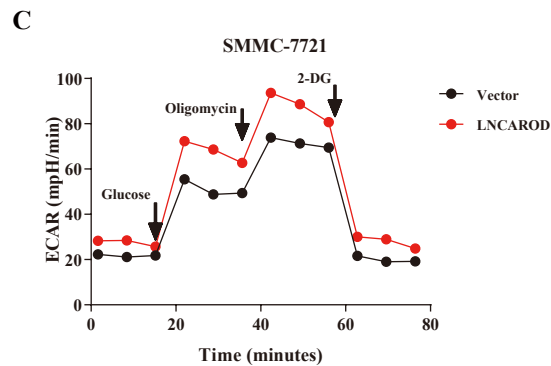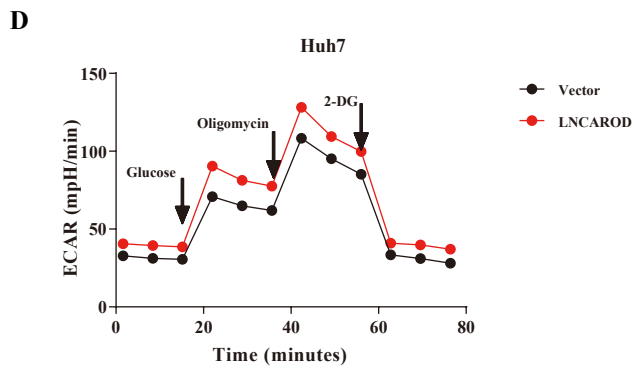

Supplement: 13046_2021_2090_MOESM3_ESM.pdf [file 13046_2021_2090_MOESM3_ESM.pdf]

**A**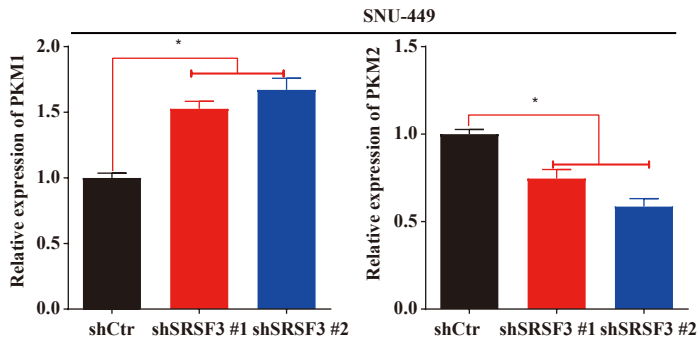**B**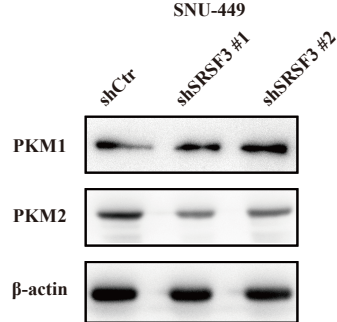**C**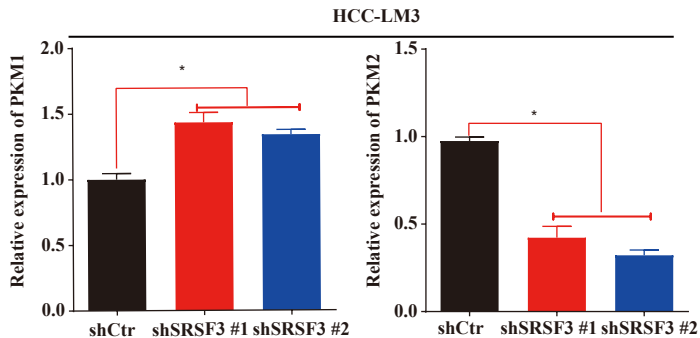**D**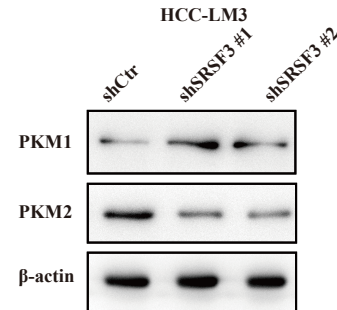

Supplement: 13046_2021_2090_MOESM4_ESM.pdf [file 13046_2021_2090_MOESM4_ESM.pdf]

# PKM2 (5315)

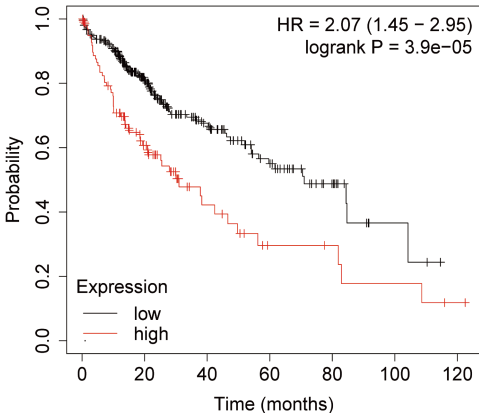

Number at risk

|      |     |     |    |    |    |   |   |
|------|-----|-----|----|----|----|---|---|
| low  | 260 | 139 | 69 | 36 | 14 | 3 | 0 |
| high | 104 | 43  | 15 | 6  | 5  | 3 | 1 |

Supplement: 13046_2021_2090_MOESM5_ESM.pdf [file 13046_2021_2090_MOESM5_ESM.pdf]

**A**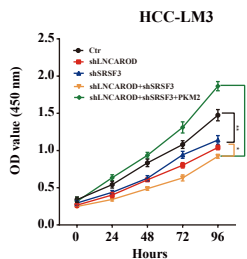**B**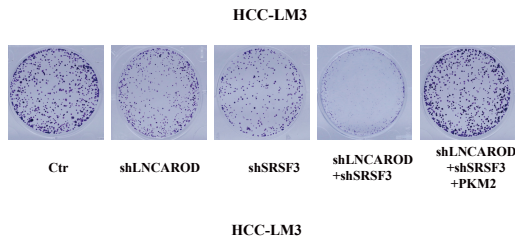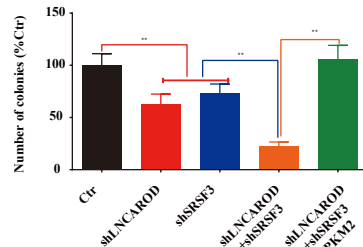**C**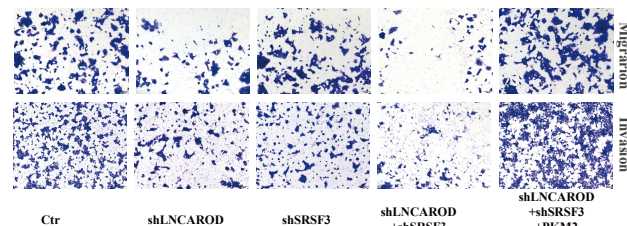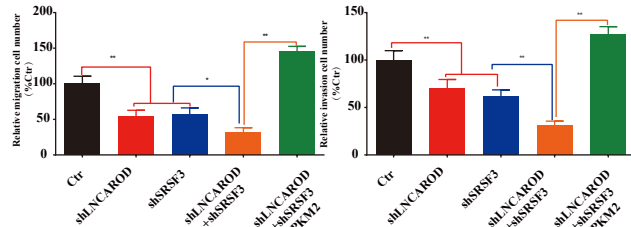**D**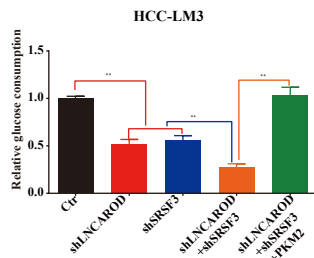**E**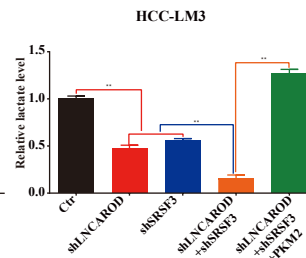**F**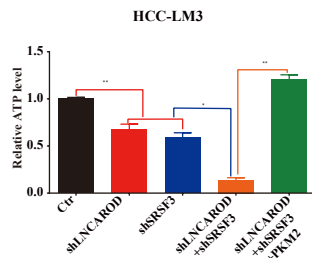**G**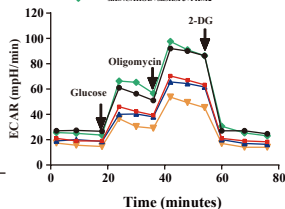

Supplement: 13046_2021_2090_MOESM6_ESM.pdf [file 13046_2021_2090_MOESM6_ESM.pdf]

**A**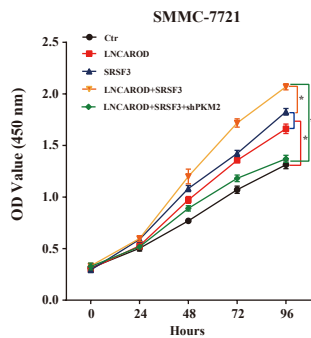**B**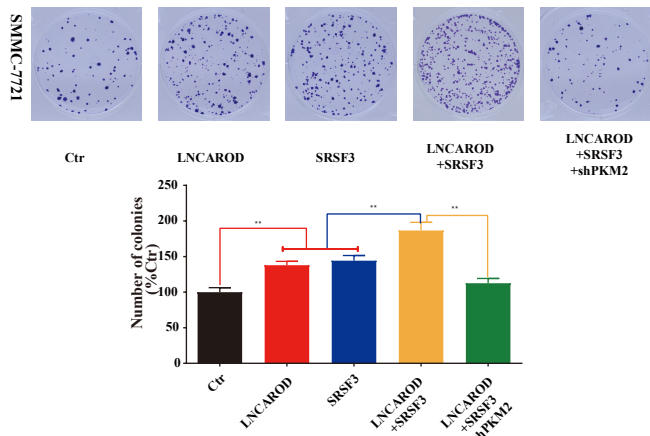**C**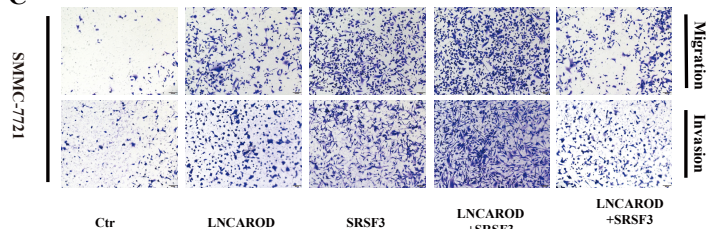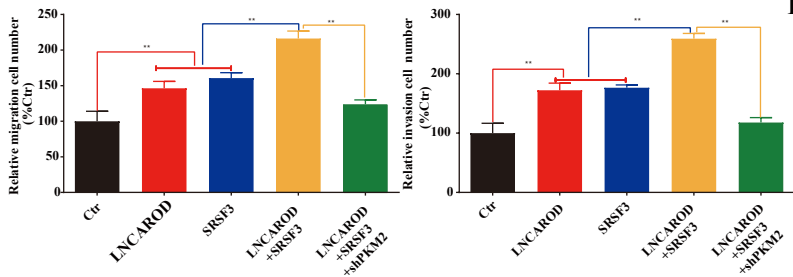**D**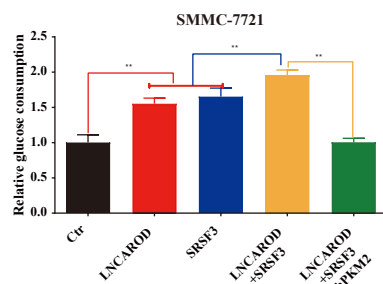**E**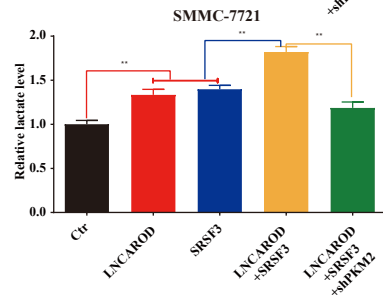**F**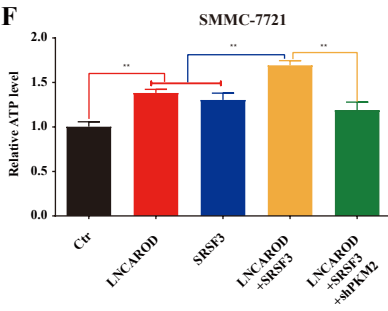**G**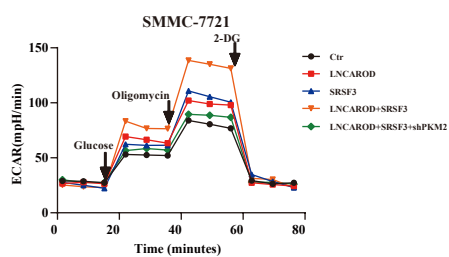

Supplement: 13046_2021_2090_MOESM7_ESM.pdf [file 13046_2021_2090_MOESM7_ESM.pdf]

**A****SNU-449**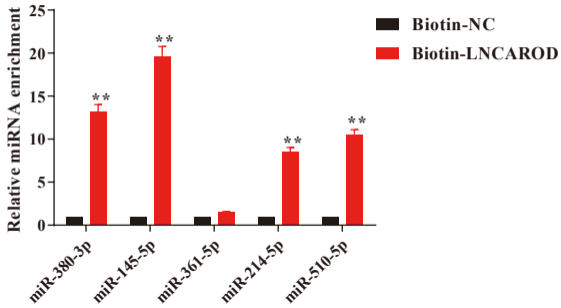**B****HCC-LM3**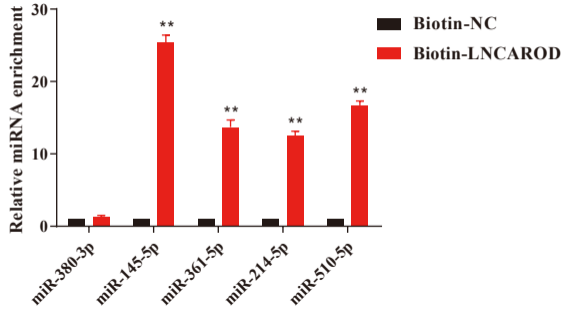

Supplement: 13046_2021_2090_MOESM8_ESM.pdf [file 13046_2021_2090_MOESM8_ESM.pdf]

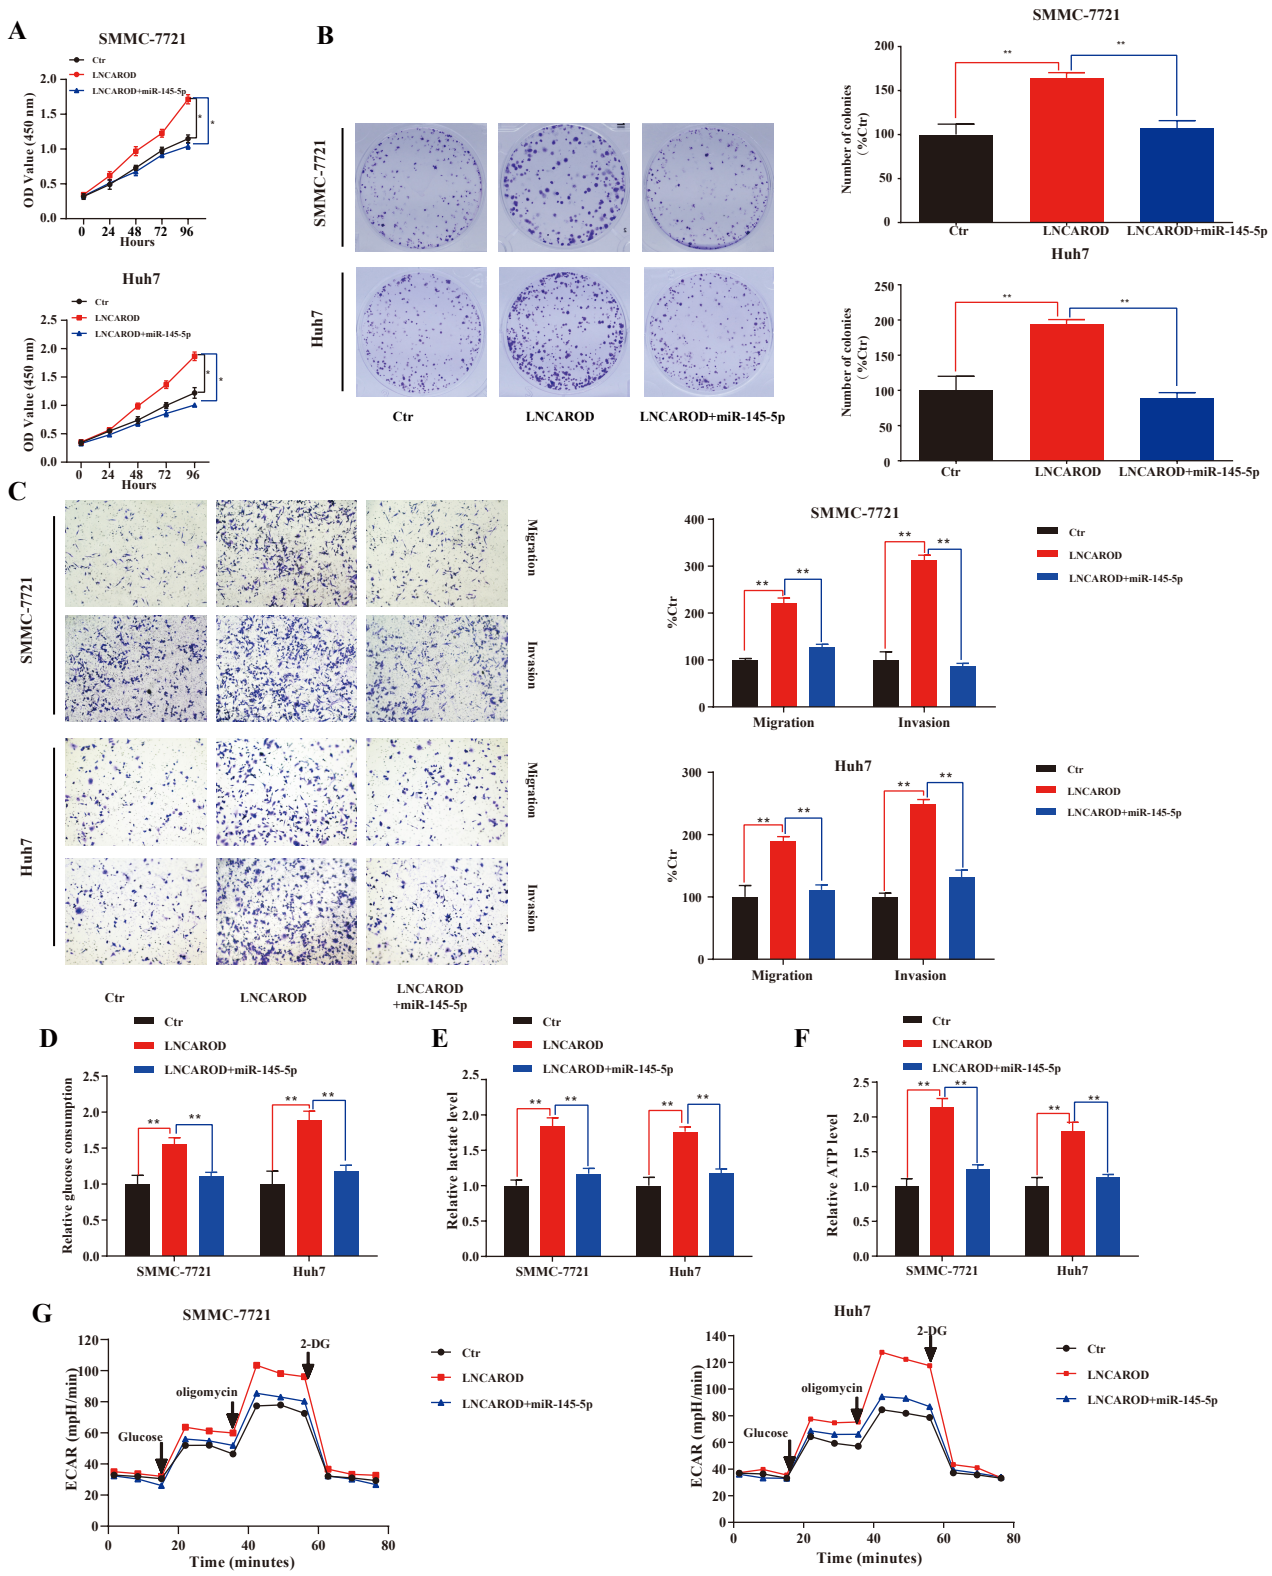

Supplement: 13046_2021_2090_MOESM9_ESM.pdf [file 13046_2021_2090_MOESM9_ESM.pdf]
